# Supplementary material for: Understanding the influence of different proxy perspectives in explaining the difference between self-rated and proxy-rated quality of life in people living with dementia: a systematic literature review and meta-analysis
Source: Qual Life Res. 2024 Apr 24;33(8):2055–66. doi: 10.1007/s11136-024-03660-w (PMC11286712; doi:10.1007/s11136-024-03660-w)
Supplement: Supplementary file 1 — Supplementary file1 (XLSX 67 KB) [file 11136_2024_3660_MOESM1_ESM.xlsx]

## Sheet: 96 studies (635 obs)
Author	Perspective	Proxy type	Sample size (dyad)	MEASURE	Groups	Setting	Dementia	Self mean	Self SD	Proxy mean	Proxy SD	Agreement test	Agreement	lower	upper
Aguirre 2016	proxy-patient	Family carers	272	DEMQOL	Total	Mixed		92.9	11.14	97.25	14.13
Aguirre 2016	proxy-patient	Family carers	159	DEMQOL	Community	Mixed		92.64	11.62	98.1	14.04						SD imputed using the prognostic method
Aguirre 2016	proxy-patient	Family carers	113	DEMQOL	Residential	Mixed		93.26	11.62	96.06	14.24						SD obtained from SE or 95% CI
Aguirre 2016	proxy-proxy	Family carers	272	QOL-AD	Total	Mixed		36.33	5.03	32.88	5.2
Aguirre 2016	proxy-proxy	Family carers	159	QOL-AD	Community	Mixed		37.11	5.04	32.53	5.6
Aguirre 2016	proxy-proxy	Family carers	113	QOL-AD	Residential	Mixed		35.24	4.81	33.38	4.56
Aleixo 2022	proxy-proxy	Mixed	13	QoL-AD	Before intervention	Community		34.84	6.26	30.23	7.13
Aleixo 2022	proxy-proxy	Mixed	13	QoL-AD	After intervention	Community		35.3	4.51	29.69	6.71
Andrieu 2016	proxy-proxy	Family carers	501	QOL-AD		Community		34.54	5.29	31.03	5.35	ICC	0.3675
Andrieu 2016	proxy-proxy	Family carers	550	QOL-AD Whole		Community		2.64	0.7	2.29	0.75	ICC	0.1992
Andrieu 2016	proxy-proxy	Family carers	546	QOL-AD Self		Community		2.54	0.67	2.32	0.84	ICC	0.2633
Andrieu 2016	proxy-proxy	Family carers	563	QOL-AD Physical		Community		2.61	0.67	2.51	0.75	ICC	0.2488
Andrieu 2016	proxy-proxy	Family carers	563	QOL-AD Mood		Community		2.55	0.66	2.34	0.7	ICC	0.281
Andrieu 2016	proxy-proxy	Family carers	541	QOL-AD Money		Community		2.71	0.69	2.56	0.86	ICC	0.1896
Andrieu 2016	proxy-proxy	Family carers	562	QOL-AD Memory		Community		1.84	0.7	1.34	0.52	ICC	0.0841
Andrieu 2016	proxy-proxy	Family carers	521	QOL-AD Marriage		Community		2.99	0.69	2.71	0.75	ICC	0.4884
Andrieu 2016	proxy-proxy	Family carers	563	QOL-AD Living		Community		2.97	0.61	2.93	0.62	ICC	0.1239
Andrieu 2016	proxy-proxy	Family carers	518	QOL-AD Fun		Community		2.39	0.79	1.91	0.8	ICC	0.314
Andrieu 2016	proxy-proxy	Family carers	518	QOL-AD Friends		Community		2.91	0.71	2.71	0.79	ICC	0.3075
Andrieu 2016	proxy-proxy	Family carers	562	QOL-AD Family		Community		3.18	0.74	2.89	0.79	ICC	0.3086
Andrieu 2016	proxy-proxy	Family carers	563	QOL-AD Energy		Community		2.52	0.73	2.12	0.8	ICC	0.258
Andrieu 2016	proxy-proxy	Family carers	533	QOL-AD Chores		Community		2.66	0.74	2.29	0.87	ICC	0.2926
Arons 2013	proxy-proxy	Family carers	175	EQ-VAS		Community		72.78	14.5215	65.33	15.6515	ICC	0.18
Arons 2013	proxy-proxy	Family carers	175	QOL-AD		Community		36.26	5.55929	30.57	5.57568
Arons 2013	proxy-proxy	Family carers	175	EQ-5D-3L		Community		0.8277	0.210008	0.6712	0.238424	ICC	0.5
Ascher-Svanum 2015	proxy-proxy	Family carers	113	QOL-AD	Diabetic	Community		36.4	5.3	34	5.9
Ascher-Svanum 2015	proxy-proxy	Family carers	859	QOL-AD	Nondiabetic	Community		38.1	6.1	35.3	6.1
Baptista 2019	proxy-proxy	Family carers	49	QOL-AD	Young onset	Community		33.45	5.913	28.71	5.888
Baptista 2019	proxy-proxy	Family carers	83	QOL-AD	Late onset	Community		34.49	4.267	30	5.949
Barbe 2018	proxy-proxy	Family carers	123	QOL-AD		Mixed		36.1	5	32.7	4.9
Barrios 2013	proxy-proxy	Family carers	104	QOL-AD		Community		29.4	6.9	25.9	6.5
Barrios 2013	proxy-proxy	Family carers	104	QOL-AD Whole		Community		2.2	0.9	1.9	0.8
Barrios 2013	proxy-proxy	Family carers	104	QOL-AD Self		Community		2.1	0.9	1.9	0.8
Barrios 2013	proxy-proxy	Family carers	104	QOL-AD Physical		Community		2.1	0.9	1.8	0.8
Barrios 2013	proxy-proxy	Family carers	104	QOL-AD Mood		Community		2.3	0.9	1.9	0.8
Barrios 2013	proxy-proxy	Family carers	104	QOL-AD Money		Community		2.2	0.8	2	0.8
Barrios 2013	proxy-proxy	Family carers	104	QOL-AD Memory		Community		1.9	0.9	1.7	0.7
Barrios 2013	proxy-proxy	Family carers	104	QOL-AD Marriage		Community		2.8	0.7	2.5	0.9
Barrios 2013	proxy-proxy	Family carers	104	QOL-AD Living		Community		2.5	0.7	2.3	0.7
Barrios 2013	proxy-proxy	Family carers	104	QOL-AD Fun		Community		1.9	1	1.7	0.8
Barrios 2013	proxy-proxy	Family carers	104	QOL-AD Friends		Community		2.4	0.8	2.3	0.9
Barrios 2013	proxy-proxy	Family carers	104	QOL-AD Family		Community		2.9	0.8	2.5	1
Barrios 2013	proxy-proxy	Family carers	104	QOL-AD Energy		Community		2	0.9	1.8	0.8
Barrios 2013	proxy-proxy	Family carers	104	QOL-AD Chores		Community		2.2	0.9	1.6	0.8
Beerens 2014	proxy-proxy	Family carers	486	QOL-AD	Institutional care	Mixed		32.5	6.3	30.3	6
Beerens 2014	proxy-proxy	Family carers	861	QOL-AD	Home care	Mixed		33.5	5.9	28.1	5.1
Belfort 2020	proxy-proxy	Family carers	138	QOL-AD	Total	Residential		33.6	5.2	29.8	6.1
Belfort 2020	proxy-proxy	Family carers	88	QOL-AD	Mild	Residential	Mild	33.5	5.1	30.5	6.3
Belfort 2020	proxy-proxy	Family carers	50	QOL-AD	Moderate	Residential	Moderate	33.7	5.5	28.5	5.5
Bosboom 2012	proxy-proxy	Family carers	80	QOL-AD		Community		34.7	5.3	29.5	5.4
Bosboom 2012	proxy-patient	Family carers	80	QOL-AD		Community		34.7	5.3	32.1	6.1
Bosboom 2014	proxy-proxy	Family carers	47	QOL-AD	Baseline	Community		37.388	5.98	32.344	5.46
Bosboom 2014	proxy-proxy	Family carers	47	QOL-AD	Follow-up	Community		36.764	5.46	29.536	7.228
Bostrom 2007	not defined	Family carers	22	EQ-VAS	Lewy-body	Mixed		55	17	43	22
Bostrom 2007	not defined	Family carers	27	EQ-VAS	Alzheimers Disease	Mixed		76	19	53	20
Bostrom 2007	proxy-proxy	Family carers	23	QOL-AD	Lewy-body	Mixed		29.77	5.33	26.13	4.55
Bostrom 2007	proxy-proxy	Family carers	30	QOL-AD	Alzheimers Disease	Mixed		37.57	5.85	30.55	0.45
Bostrom 2007	not defined	Family carers	24	EQ-5D-3L	Lewy-body	Mixed		0.38	0.38	0.24	0.3
Bostrom 2007	not defined	Family carers	32	EQ-5D-3L	Alzheimers Disease	Mixed		0.87	0.17	0.56	0.29
Brennan 2023	proxy-proxy	Formal carers	101	QOL-AD 15-item		Residential		3.15	0.53	2.7	0.58
Brennan 2023	proxy-proxy	Formal carers	53	QOL-AD 15-item	Age≤88	Residential		3.08	0.53	2.62	0.58
Brennan 2023	proxy-proxy	Formal carers	48	QOL-AD 15-item	Age>89	Residential		3.23	0.53	2.78	0.58
Brennan 2023	proxy-proxy	Formal carers	19	QOL-AD 15-item	Male	Residential		3	0.53	2.54	0.58
Brennan 2023	proxy-proxy	Formal carers	82	QOL-AD 15-item	Female	Residential		3.19	0.53	2.73	0.58
Brennan 2023	proxy-proxy	Formal carers	60	QOL-AD 15-item	FAST ≤5	Residential		3.18	0.53	2.8	0.58
Brennan 2023	proxy-proxy	Formal carers	41	QOL-AD 15-item	FAST >6	Residential		3.11	0.53	2.55	0.58
Bruvik 2012	proxy-proxy	Family carers	230	QOL-AD	Total	Community		36.9	5.6	32.8	5
Bruvik 2012	proxy-proxy	Family carers	100	QOL-AD	Not living together	Community		37.4	5.3	32.1	5.1
Bruvik 2012	proxy-proxy	Family carers	130	QOL-AD	Living together	Community		36.5	5.8	33.4	5
Crespo 2013	proxy-proxy	Family carers	102	QOL-AD 15-item		Residential		2.51	0.71	1.95	0.82
Crespo 2013	proxy-proxy	Formal carers	102	QOL-AD 15-item		Residential		2.51	0.71	2.06	0.83
Cummings 2006	proxy-proxy	Family carers	322	QOL-AD	Depressed	Community		34.94	5.36	37.9	6.2
Cummings 2006	proxy-proxy	Family carers	322	QOL-AD	Not depressed	Community		41.65	4.9	42.78	5
D'Cunha 2019	proxy-patient	Mixed	25	DEMQOL	Baseline	Residential		91.5	19.7704	94.4	16
D'Cunha 2019	proxy-patient	Mixed	25	DEMQOL	Post	Residential		101	14.6684	101	9.59
D'Cunha 2019	proxy-patient	Mixed	25	DEMQOL	Follow-up	Residential		98.5	20.4082	95.5	14.2
Dewitte 2017	proxy-proxy	Formal carers	88	QOL-AD 12-item		Residential		34.71	3.76	28.41	4.66	ICC	0.14	-0.073	0.358
Dixit 2021	proxy-proxy	Family carers	26	QOL-AD		Community		35.7	6.9	29	6.4
Dourado 2021	proxy-proxy	Family carers	256	QOL-AD		Community		33.84	6.32	29.87	7.13
Edelman 2004	proxy-proxy	Formal carers	36	QOL-AD 15-item		Community		3.1	0.5	2.5	0.5
Edelman 2005	proxy-proxy	Formal carers	65	QOL-AD 15-item	Total	Residential		3.1	0.5	2.4	0.5
Edelman 2005	proxy-proxy	Formal carers	38	QOL-AD 15-item	Special care facility	Residential		3.1	0.5	2.2	0.4
Edelman 2005	proxy-proxy	Formal carers	27	QOL-AD 15-item	Assisted care facility	Residential		3.1	0.4	2.9	0.5
Farina 2020	proxy-patient	Family carers	110	DEMQOL	Mild	Mixed	Mild	90.5	13.18	93.5	13.7
Farina 2020	proxy-patient	Family carers	100	DEMQOL	Moderate	Mixed	Moderate	92.8	12.6	94.3	14.4
Farina 2020	not defined	Family carers	110	EQ-5D-3L	Mild	Mixed	Mild	0.8	0.2	0.7	0.3
Farina 2020	not defined	Family carers	100	EQ-5D-3L	Moderate	Mixed	Moderate	0.8	0.2	0.5	0.3
Farina 2022	proxy-patient	Family carers	87	DEMQOL		Community		94.54	11.98	90.59	13.95
Felekoglu 2021	proxy-proxy	Family carers	73	QOL-AD		Community		38.01	4.12	31.62	5.2
Ferry 2020	proxy-patient	Family carers	30	DEMQOL-U	T0	Community		0.8445	0.208516	0.674	0.237684
Ferry 2020	proxy-patient	Family carers	30	DEMQOL-U	T1	Community		0.8679	0.208516	0.699	0.237684
Ferry 2020	proxy-patient	Family carers	30	DEMQOL-U	T2	Community		0.9013	0.208516	0.669	0.237684
Fleming 2014	proxy-patient	Formal carers	275	DEMQOL		Residential		90.05	14.31	97.75	7.99
Froelich 2021	not defined	Family carers	616	EQ-VAS	Total	Residential		72.69	18.36	63.78	20.06
Froelich 2021	not defined	Family carers	254	EQ-VAS	Mild	Residential	Mild	73.05	17.85	65.65	19.21
Froelich 2021	not defined	Family carers	362	EQ-VAS	Moderate	Residential	Moderate	72.45	18.73	62.46	20.56
Froelich 2021	not defined	Family carers	616	EQ-5D-5L	Total	Residential		0.85	0.18	0.76	0.21
Froelich 2021	not defined	Family carers	254	EQ-5D-5L	Mild	Residential	Mild	0.85	0.17	0.78	0.2
Froelich 2021	not defined	Family carers	362	EQ-5D-5L	Moderate	Residential	Moderate	0.85	0.18	0.74	0.22
Fuh 2006	proxy-proxy	Family carers	90	QOL-AD		Community		30.4	6.2	28.2	5.4
Gibbor 2021	proxy-proxy	Family carers	33	QOL-AD	Total	Residential		35.07	6.21	29.16	4.9
Gibbor 2021	proxy-proxy	Family carers	17	QOL-AD	iCST	Residential		33.23	6.5	29.76	4.57
Gibbor 2021	proxy-proxy	Family carers	16	QOL-AD	TAU	Residential		37.02	5.42	28.53	5.29
Giebel 2014	proxy-proxy	Family carers	263	QOL-AD	Mild	Mixed	Mild	34.4	5.4	29.5	5.2
Giebel 2014	proxy-proxy	Family carers	521	QOL-AD	Moderate	Mixed	Moderate	33.2	5.8	28.4	4.9
Giebel 2014	proxy-proxy	Family carers	242	QOL-AD	Severe	Mixed	Severe	32.6	6.8	27	4.9
Giebel 2015	proxy-proxy	Family carers	21	QOL-AD 10-item	Mild	Mixed	Mild	37.3	4.7	29.4	6.2
Giebel 2015	proxy-proxy	Family carers	57	QOL-AD 10-item	Moderate	Mixed	Moderate	35.2	5.5	30.7	6.3
Giebel 2015	proxy-proxy	Family carers	44	QOL-AD 10-item	Severe	Mixed	Severe	35.9	5.5	28.6	5.4
Giebel 2015a	proxy-proxy	Mixed	414	QOL-AD	Total	Mixed		32.7	6.3	28.6	5.4
Giebel 2015a	proxy-proxy	Family carers	217	QOL-AD	Community	Mixed		33	6.5	27.1	4.9
Giebel 2015a	proxy-proxy	Formal carers	197	QOL-AD	Care home	Mixed		32.4	6.2	30.3	5.1
Gomez-Gallego 2012	proxy-patient	Family carers	102	QOL-AD		Community		34.95	6.48	29.76	4.92	ICC	0.542
Gomez-Gallego 2012	proxy-patient	Formal carers	102	QOL-AD		Community		34.95	6.48	30.27	8.15	ICC	0.404
Gomez-Gallego 2015	proxy-patient	Family carers	138	DEMQOL		Community		84.31	12.62	79.86	15.44
Gomez-Gallego 2015	proxy-patient	Family carers	138	DEMQOL memory		Community		17.52	4.75	16.52	5.67
Gomez-Gallego 2015	proxy-patient	Family carers	138	DEMQOL feelings		Community		40.43	7.06	36.68	8.04
Gomez-Gallego 2015	proxy-patient	Family carers	138	DEMQOL ADL		Community		23.8	4.86	24.15	5.19
Graeske 2012	proxy-proxy	Formal carers	49	QOL-AD		Residential		34.3	6.3	31.2	5.2
Graeske 2012	proxy-proxy	Formal carers	49	QOL-AD Whole		Residential		2.71	0.89	2.73	0.569
Graeske 2012	proxy-proxy	Formal carers	49	QOL-AD Self		Residential		2.69	0.683	2.63	0.668
Graeske 2012	proxy-proxy	Formal carers	49	QOL-AD Physical		Residential		2.39	0.909	2.51	0.681
Graeske 2012	proxy-proxy	Formal carers	49	QOL-AD Mood		Residential		2.69	0.742	2.53	0.649
Graeske 2012	proxy-proxy	Formal carers	49	QOL-AD Money		Residential		2.39	0.812	2.35	0.991
Graeske 2012	proxy-proxy	Formal carers	49	QOL-AD Memory		Residential		2.33	0.747	1.82	0.755
Graeske 2012	proxy-proxy	Formal carers	49	QOL-AD Marriage		Residential		2.55	0.891	2.06	1.107
Graeske 2012	proxy-proxy	Formal carers	49	QOL-AD Living		Residential		3.2	0.539	3.18	0.565
Graeske 2012	proxy-proxy	Formal carers	49	QOL-AD Fun		Residential		2.71	0.707	2.39	0.931
Graeske 2012	proxy-proxy	Formal carers	49	QOL-AD Friends		Residential		2.73	0.884	1.98	0.946
Graeske 2012	proxy-proxy	Formal carers	49	QOL-AD Family		Residential		2.71	0.935	2.35	1.147
Graeske 2012	proxy-proxy	Formal carers	49	QOL-AD Energy		Residential		2.55	0.867	2.37	0.755
Graeske 2012	proxy-proxy	Formal carers	49	QOL-AD Chores		Residential		2.65	0.805	2.31	1.025
Handels 2018	not defined	Family carers	451	EQ-VAS		Community		72	19	61	20
Handels 2018	not defined	Family carers	451	ICECAP-O		Community		0.82	0.15	0.69	0.17
Handels 2018	not defined	Family carers	451	EQ-5D-5L		Community		0.84	0.16	0.71	0.20
Handels 2018	proxy-patient	Family carers	451	DEMQOL-U		Community		0.87	0.1	0.74	0.13
Heggie 2011	proxy-proxy	Family carers	119	QOL-AD	Clinic day	Community		34.9	5.9	31.8	6.3
Heggie 2011	proxy-proxy	Family carers	32	QOL-AD	Sub sample clinic day	Community		34.53	4.84	34.2	6.19
Heggie 2011	proxy-proxy	Family carers	32	QOL-AD	Sub sample FU	Community		35.47	5.47	32.57	6.22
Heggie 2011	proxy-proxy	Family carers	32	QOL-AD Whole	Sub sample clinic day	Community		2.97	0.7	2.67	0.66
Heggie 2011	proxy-proxy	Family carers	32	QOL-AD Whole	Sub sample FU	Community		2.91	0.64	2.7	0.65
Heggie 2011	proxy-proxy	Family carers	32	QOL-AD Self	Sub sample clinic day	Community		2.69	0.64	2.67	0.84
Heggie 2011	proxy-proxy	Family carers	32	QOL-AD Self	Sub sample FU	Community		2.78	0.55	2.47	0.73
Heggie 2011	proxy-proxy	Family carers	32	QOL-AD Physical	Sub sample clinic day	Community		2.72	0.52	2.57	0.73
Heggie 2011	proxy-proxy	Family carers	32	QOL-AD Physical	Sub sample FU	Community		2.53	0.76	2.5	0.63
Heggie 2011	proxy-proxy	Family carers	32	QOL-AD Mood	Sub sample clinic day	Community		2.56	0.68	2.47	0.63
Heggie 2011	proxy-proxy	Family carers	32	QOL-AD Mood	Sub sample FU	Community		2.41	0.76	2.3	0.7
Heggie 2011	proxy-proxy	Family carers	32	QOL-AD Money	Sub sample clinic day	Community		2.72	0.73	2.63	0.89
Heggie 2011	proxy-proxy	Family carers	32	QOL-AD Money	Sub sample FU	Community		2.78	0.75	2.6	0.93
Heggie 2011	proxy-proxy	Family carers	32	QOL-AD Memory	Sub sample clinic day	Community		1.5	0.51	1.6	0.62
Heggie 2011	proxy-proxy	Family carers	32	QOL-AD Memory	Sub sample FU	Community		1.94	0.56	1.97	0.67
Heggie 2011	proxy-proxy	Family carers	32	QOL-AD Marriage	Sub sample clinic day	Community		3.09	0.69	3.3	0.75
Heggie 2011	proxy-proxy	Family carers	32	QOL-AD Marriage	Sub sample FU	Community		3.16	0.68	3.03	0.77
Heggie 2011	proxy-proxy	Family carers	32	QOL-AD Living	Sub sample clinic day	Community		3	0.57	3.1	0.66
Heggie 2011	proxy-proxy	Family carers	32	QOL-AD Living	Sub sample FU	Community		3.16	0.57	2.93	0.74
Heggie 2011	proxy-proxy	Family carers	32	QOL-AD Fun	Sub sample clinic day	Community		2.34	0.87	2.27	0.87
Heggie 2011	proxy-proxy	Family carers	32	QOL-AD Fun	Sub sample FU	Community		2.63	0.71	2.2	0.81
Heggie 2011	proxy-proxy	Family carers	32	QOL-AD Friends	Sub sample clinic day	Community		2.88	0.61	2.93	0.74
Heggie 2011	proxy-proxy	Family carers	32	QOL-AD Friends	Sub sample FU	Community		3.03	0.65	2.63	0.72
Heggie 2011	proxy-proxy	Family carers	32	QOL-AD Family	Sub sample clinic day	Community		3.28	0.58	3.3	0.65
Heggie 2011	proxy-proxy	Family carers	32	QOL-AD Family	Sub sample FU	Community		3.28	0.46	2.9	0.71
Heggie 2011	proxy-proxy	Family carers	32	QOL-AD Energy	Sub sample clinic day	Community		2.22	0.75	2.1	0.71
Heggie 2011	proxy-proxy	Family carers	32	QOL-AD Energy	Sub sample FU	Community		2.16	0.68	2.07	0.58
Heggie 2011	proxy-proxy	Family carers	32	QOL-AD Chores	Sub sample clinic day	Community		2.56	0.91	2.6	0.89
Heggie 2011	proxy-proxy	Family carers	32	QOL-AD Chores	Sub sample FU	Community		2.72	0.77	2.27	0.87
Hessmann 2018	not defined	Family carers	122	EQ-VAS	Antidepressant	Mixed		58.8	17.9	44.4	21.5
Hessmann 2018	not defined	Family carers	273	EQ-VAS	No Antidepressant	Mixed		60.9	20.1	51	23.4
Hessmann 2018	proxy-proxy	Family carers	122	QOL-AD	Antidepressant	Mixed		30.2	5.6	22.4	6.2
Hessmann 2018	proxy-proxy	Family carers	273	QOL-AD	No Antidepressant	Mixed		30.2	5.7	25.2	7.3
Hessmann 2018	not defined	Family carers	122	EQ-5D	Antidepressant	Mixed		0.674	0.334	0.348	0.346
Hessmann 2018	not defined	Family carers	273	EQ-5D	No Antidepressant	Mixed		0.663	0.322	0.51	0.363
Hilgeman 2014	not defined	Family carers	10	EQ-VAS	Intervention B	Community		77	15.67	55	19.2
Hilgeman 2014	not defined	Family carers	10	EQ-VAS	Intervention Post	Community		77.5	14.19	58.5	17.8
Hilgeman 2014	not defined	Family carers	8	EQ-VAS	Comparison B	Community		73.12	11	60.67	20.11
Hilgeman 2014	not defined	Family carers	8	EQ-VAS	Comparison Post	Community		75	21.21	62.86	17.99
Hilgeman 2014	proxy-proxy	Family carers	10	QOL-AD	Intervention B	Community		36.3	5.87	15.1	3.8
Hilgeman 2014	proxy-proxy	Family carers	10	QOL-AD	Intervention Post	Community		38.09	4.85	18.2	3.04
Hilgeman 2014	proxy-proxy	Family carers	8	QOL-AD	Comparison B	Community		40.88	5	16.95	4.69
Hilgeman 2014	proxy-proxy	Family carers	8	QOL-AD	Comparison Post	Community		39.43	3.96	15.63	5.07
Huang 2008	proxy-proxy	Family carers	120	QOL-AD		Community		31.58	5.88	27.08	5.85
Inouye 2010	proxy-proxy	Family carers	39	QOL-AD		Community		29.32	6.27	28.33	5.58
Jayakody 2023	proxy-patient	Mixed	272	DEMQOL		Residential		79.67	12.04	70.57	12.28
Jayakody 2023	proxy-patient	Mixed	272	DEMQOL feelings		Residential		11.85	3.14	9.5	2.92
Jayakody 2023	proxy-patient	Mixed	272	DEMQOL feelings		Residential		22.59	4.64	14.72	4.07
Jayakody 2023	proxy-patient	Mixed	272	DEMQOL memory		Residential		16.32	3.39	19.78	5.1
Jayakody 2023	proxy-patient	Mixed	272	DEMQOL ADL		Residential		27.5	27.5	20.19	3.84
Joennsson 2006	proxy-proxy	Family carers	376	QOL-AD	MMSE 26-30	Mixed		38.8	5.55929	34.4	5.57568
Joennsson 2006	proxy-proxy	Family carers	376	QOL-AD	MMSE 21-25	Mixed	Mild	38.8	5.55929	32.1	5.57568
Joennsson 2006	proxy-proxy	Family carers	376	QOL-AD	MMSE 15-20	Mixed	Moderate	36.4	5.55929	29.2	5.57568
Joennsson 2006	proxy-proxy	Family carers	376	QOL-AD	MMSE 10-15	Mixed	Severe	36	5.55929	29.2	5.57568
Joennsson 2006	proxy-proxy	Family carers	376	QOL-AD	MMSE 0-9	Mixed	Severe	37.2	5.55929	28.2	5.57568
Joennsson 2006	not defined	Family carers	649	EQ-5D-3L	MMSE 26-30	Mixed		0.84	0.210008	0.7	0.238424
Joennsson 2006	not defined	Family carers	649	EQ-5D-3L	MMSE 21-25	Mixed	Mild	0.85	0.210008	0.65	0.238424
Joennsson 2006	not defined	Family carers	649	EQ-5D-3L	MMSE 15-20	Mixed	Moderate	0.83	0.210008	0.52	0.238424
Joennsson 2006	not defined	Family carers	649	EQ-5D-3L	MMSE 10-15	Mixed	Severe	0.73	0.210008	0.51	0.238424
Joennsson 2006	not defined	Family carers	649	EQ-5D-3L	MMSE 0-9	Mixed	Severe	0.78	0.210008	0.4	0.238424
Kimura 2018	proxy-proxy	Family carers	53	QOL-AD	Young-onset	Community		33.6	6.5	29.4	6.4
Kimura 2018	proxy-proxy	Family carers	57	QOL-AD	Late-onset	Community		32.9	5.8	29.6	7.8
Kimura 2021	proxy-proxy	Family carers	110	QOL-AD	Total	Community		33.96	5.4	30.01	6.2
Kimura 2021	proxy-proxy	Family carers	55	QOL-AD	Young-onset	Community		34.02	6.1	28.13	5.8
Kimura 2021	proxy-proxy	Family carers	55	QOL-AD	Late-onset	Community		33.91	4.8	31.89	6.1
Kisvetrova 2018	proxy-proxy	Family carers	212	QOL-AD		Community		35.61	5.35	34.74	5.36	ICC	0.6
Kisvetrova 2018	proxy-proxy	Family carers	212	QOL-AD Whole		Community		2.81	0.6	2.8	0.57	ICC	0.47
Kisvetrova 2018	proxy-proxy	Family carers	212	QOL-AD Self		Community		2.68	0.59	2.62	0.7	ICC	0.33
Kisvetrova 2018	proxy-proxy	Family carers	212	QOL-AD Physical		Community		2.46	0.69	2.44	0.59	ICC	0.48
Kisvetrova 2018	proxy-proxy	Family carers	212	QOL-AD Mood		Community		2.66	0.73	2.54	0.75	ICC	0.47
Kisvetrova 2018	proxy-proxy	Family carers	212	QOL-AD Money		Community		2.82	0.63	2.83	0.58	ICC	0.4
Kisvetrova 2018	proxy-proxy	Family carers	212	QOL-AD Memory		Community		2.26	0.75	2.17	0.8	ICC	0.44
Kisvetrova 2018	proxy-proxy	Family carers	212	QOL-AD Marriage		Community		3.13	0.67	3.11	0.7	ICC	0.37
Kisvetrova 2018	proxy-proxy	Family carers	212	QOL-AD Living		Community		3.16	0.47	3.23	0.54	ICC	0.25
Kisvetrova 2018	proxy-proxy	Family carers	212	QOL-AD Fun		Community		2.5	0.76	2.32	0.86	ICC	0.54
Kisvetrova 2018	proxy-proxy	Family carers	212	QOL-AD Friends		Community		2.98	0.66	2.85	0.74	ICC	0.36
Kisvetrova 2018	proxy-proxy	Family carers	212	QOL-AD Family		Community		3.21	0.58	3.26	0.62	ICC	0.43
Kisvetrova 2018	proxy-proxy	Family carers	212	QOL-AD Energy		Community		2.5	0.69	2.42	0.69	ICC	0.41
Kisvetrova 2018	proxy-proxy	Family carers	212	QOL-AD Chores		Community		2.5	0.82	2.2	0.88	ICC	0.46
Kunz 2010	proxy-patient	Family carers	333	EQ-5D-3L	Total	Community		0.65	0.210008	0.55	0.238424	ICC	0.48	0.4	0.56
Kunz 2010	proxy-patient	Family carers	117	EQ-5D-3L	MMSE 10-17	Community	Severe	0.58	0.210008	0.46	0.238424	ICC	0.33	0.16	0.48
Kunz 2010	proxy-patient	Family carers	216	EQ-5D-3L	MMSE 18-24	Community	Mild	0.69	0.210008	0.6	0.238424	ICC	0.54	0.43	0.62
Lacerda 2020	proxy-proxy	Family carers	74	QOL-AD	Mild	Community	Mild	33.45	5.177	30.46	6.392
Lacerda 2020	proxy-proxy	Family carers	54	QOL-AD	Moderate	Community	Moderate	34.44	5.269	29.02	5.261
Lacey 2015	proxy-proxy	Family carers	493	QOL-AD	Study 301 - Placebo	Community		39.7	5.64	36	5.93
Lacey 2015	proxy-proxy	Family carers	621	QOL-AD	Study 301 Bapineuzumab	Community		39.4	5.43	36.5	5.92
Lacey 2015	proxy-proxy	Family carers	432	QOL-AD	Study 302 - Placebo	Community		41	5.05	37.4	5.56
Lacey 2015	proxy-proxy	Family carers	658	QOL-AD	Study 302 Bapineuzumab	Community		40.8	5.21	37	5.67
Lamb 2018	not defined	Family carers	449	EQ-VAS		Community		79	18	68	18.9
Lamb 2018	proxy-proxy	Family carers	349	QOL-AD		Community		38.9	5.4	32.9	6
Lamb 2018	not defined	Family carers	451	EQ-5D-3L		Community		0.83	0.19	0.69	0.24
Lee 2023	proxy-proxy	Family carers	26	QoL-AD	Baseline all	Community		31.5	6.3	28.2	5
Lee 2023	proxy-proxy	Family carers	15	QoL-AD	Baseline completers	Community		32.2	6.75	28.8	5.4
Lee 2023	proxy-proxy	Family carers	15	QoL-AD	Week 12 completers	Community		33.8	6.6	30.93	5.42
Leontjevas 2016	proxy-proxy	Formal carers	582	EQ-VAS	Total	Residential		65.37	8.52	64.42	5.41
Leontjevas 2016	proxy-proxy	Formal carers	167	EQ-VAS	Dementia specific unit	Residential		70.33	7.44	67.18	3.63	ICC	0.05	-0.10	0.2
Leontjevas 2016	proxy-proxy	Formal carers	271	EQ-VAS	Somatic unit	Residential		60.7	6.75	61.83	5.62	ICC	0.16	0.05	0.28
Leontjevas 2016	proxy-patient	Formal carers	582	EQ-VAS	Total	Residential		65.37	8.52	65.15	7.17
Leontjevas 2016	proxy-patient	Formal carers	168	EQ-VAS	Dementia specific unit	Residential		70.33	7.44	69.9	5.05	ICC	0.18	0.03	0.32
Leontjevas 2016	proxy-patient	Formal carers	273	EQ-VAS	Somatic unit	Residential		60.7	6.75	60.67	5.92	ICC	0.07	-0.05	0.18
Leontjevas 2016	proxy-proxy	Formal carers	582	EQ-5D-3L	Total	Residential		0.609	0.155	0.492	0.085
Leontjevas 2016	proxy-proxy	Formal carers	225	EQ-5D-3L	Dementia specific unit	Residential		0.736	0.083	0.495	0.057	ICC	0.29	0.16	0.4
Leontjevas 2016	proxy-proxy	Formal carers	308	EQ-5D-3L	Somatic unit	Residential		0.49	0.102	0.47	0.105	ICC	0.46	0.37	0.55
Leontjevas 2016	proxy-patient	Formal carers	582	EQ-5D-3L	Total	Residential		0.609	0.155	0.555	0.106
Leontjevas 2016	proxy-patient	Formal carers	216	EQ-5D-3L	Dementia specific unit	Residential		0.736	0.083	0.606	0.084	ICC	0.37	0.25	0.48
Leontjevas 2016	proxy-patient	Formal carers	302	EQ-5D-3L	Somatic unit	Residential		0.49	0.102	0.506	0.103	ICC	0.51	0.42	0.59
Leroi 2019	not defined	Family carers	19	SF-12 PCS		Community		45.74	11.85	42.02	10.46
Leroi 2019	not defined	Family carers	19	SF-12 MSC		Community		49.38	10.1	49.27	10.45
Leroi 2019	proxy-patient	Family carers	19	DEMQOL		Community		93.42	10.92	100.94	11.49
Leroi 2019	not defined	Family carers	19	EQ-5D-5L		Community		0.83	0.17	0.77	0.21
Leroi 2019	proxy-patient	Family carers	19	DEMQOL-U		Community		0.87	0.1	0.82	0.11
Logsdon 1999	proxy-patient	Family carers	77	QOL-AD		Community		38.03	5.81	33.35	5.91
Logsdon 1999	proxy-patient	Family carers	77	QOL-AD Whole		Community		3.06	0.69	2.73	0.58
Logsdon 1999	proxy-patient	Family carers	77	QOL-AD Self		Community		2.81	0.69	2.63	0.63
Logsdon 1999	proxy-patient	Family carers	77	QOL-AD Physical		Community		2.84	0.78	2.8	0.77
Logsdon 1999	proxy-patient	Family carers	77	QOL-AD Mood		Community		2.82	0.77	2.39	0.8
Logsdon 1999	proxy-patient	Family carers	77	QOL-AD Money		Community		2.66	0.74	2.44	0.81
Logsdon 1999	proxy-patient	Family carers	77	QOL-AD Memory		Community		2.26	0.71	1.43	0.6
Logsdon 1999	proxy-patient	Family carers	77	QOL-AD Marriage		Community		3.42	0.61	3.16	0.7
Logsdon 1999	proxy-patient	Family carers	77	QOL-AD Living		Community		3.31	0.61	3.19	0.61
Logsdon 1999	proxy-patient	Family carers	77	QOL-AD Fun		Community		3.06	0.68	2.68	0.76
Logsdon 1999	proxy-patient	Family carers	77	QOL-AD Friends		Community		3	0.67	2.61	0.88
Logsdon 1999	proxy-patient	Family carers	77	QOL-AD Family		Community		3.39	0.61	3.12	0.68
Logsdon 1999	proxy-patient	Family carers	77	QOL-AD Energy		Community		2.7	0.71	2.12	0.82
Logsdon 1999	proxy-patient	Family carers	77	QOL-AD Chores		Community		2.69	0.78	2.05	0.73
Matsui 2006	proxy-proxy	Family carers	140	QOL-AD		Community		29.09	4.43	24.71	4.87
Matsui 2006	proxy-proxy	Family carers	140	QOL-AD Whole		Community		2.04	0.56	2.01	0.68
Matsui 2006	proxy-proxy	Family carers	140	QOL-AD Self		Community		2.15	0.56	2.01	0.59
Matsui 2006	proxy-proxy	Family carers	140	QOL-AD Physical		Community		2.27	0.62	2.1	0.65
Matsui 2006	proxy-proxy	Family carers	140	QOL-AD Mood		Community		1.92	0.65	1.87	0.67
Matsui 2006	proxy-proxy	Family carers	140	QOL-AD Money		Community		2.24	0.58	2	0.62
Matsui 2006	proxy-proxy	Family carers	140	QOL-AD Memory		Community		2.09	0.66	1.86	0.55
Matsui 2006	proxy-proxy	Family carers	140	QOL-AD Marriage		Community		2.24	0.67	2.24	0.72
Matsui 2006	proxy-proxy	Family carers	140	QOL-AD Living		Community		2.22	0.61	2.15	0.61
Matsui 2006	proxy-proxy	Family carers	140	QOL-AD Fun		Community		1.84	0.61	1.69	0.67
Matsui 2006	proxy-proxy	Family carers	140	QOL-AD Friends		Community		2.23	0.68	2.14	0.76
Matsui 2006	proxy-proxy	Family carers	140	QOL-AD Family		Community		2.27	0.73	2.16	0.78
Matsui 2006	proxy-proxy	Family carers	140	QOL-AD Energy		Community		1.94	0.66	1.81	0.7
Matsui 2006	proxy-proxy	Family carers	140	QOL-AD Chores		Community		2.24	0.64	2	0.67
Moon 2016	proxy-proxy	Family carers	200	QOL-AD		Community		33.39	6.44	37.6	6.08
Moyle 2011	proxy-proxy	Family carers	58	QOL-AD 15-item		Residential		2.62	0.46	2.34	0.5
Moyle 2011	proxy-proxy	Formal carers	58	QOL-AD 15-item		Residential		2.62	0.46	2.35	0.57
Moyle 2011	proxy-proxy	Family carers	58	QOL-AD Take care		Residential		2.55	0.86	1.84	0.85
Moyle 2011	proxy-proxy	Formal carers	58	QOL-AD Take care		Residential		2.55	0.86	1.69	0.8
Moyle 2011	proxy-proxy	Family carers	58	QOL-AD Staff		Residential		3.28	0.62	3.12	0.65
Moyle 2011	proxy-proxy	Formal carers	58	QOL-AD Staff		Residential		3.28	0.62	2.9	0.67
Moyle 2011	proxy-proxy	Family carers	58	QOL-AD Self		Residential		2.62	0.59	2.33	0.71
Moyle 2011	proxy-proxy	Formal carers	58	QOL-AD Self		Residential		2.62	0.59	2.48	0.73
Moyle 2011	proxy-proxy	Family carers	58	QOL-AD Physical		Residential		2.36	0.77	2.09	0.68
Moyle 2011	proxy-proxy	Formal carers	58	QOL-AD Physical		Residential		2.36	0.77	2.24	0.82
Moyle 2011	proxy-proxy	Family carers	58	QOL-AD Others		Residential		2.76	0.66	2.43	0.73
Moyle 2011	proxy-proxy	Formal carers	58	QOL-AD Others		Residential		2.76	0.66	2.47	0.68
Moyle 2011	proxy-proxy	Family carers	58	QOL-AD Mood		Residential		2.57	0.77	2.48	0.8
Moyle 2011	proxy-proxy	Formal carers	58	QOL-AD Mood		Residential		2.57	0.77	2.47	0.73
Moyle 2011	proxy-proxy	Family carers	58	QOL-AD Memory		Residential		2.24	0.76	1.95	0.78
Moyle 2011	proxy-proxy	Formal carers	58	QOL-AD Memory		Residential		2.24	0.76	1.95	0.83
Moyle 2011	proxy-proxy	Family carers	58	QOL-AD Living		Residential		2.95	0.85	2.97	0.72
Moyle 2011	proxy-proxy	Formal carers	58	QOL-AD Living		Residential		2.95	0.85	3.05	0.54
Moyle 2011	proxy-proxy	Family carers	58	QOL-AD Life overall		Residential		2.67	0.82	2.36	0.81
Moyle 2011	proxy-proxy	Formal carers	58	QOL-AD Life overall		Residential		2.67	0.82	2.48	0.8
Moyle 2011	proxy-proxy	Family carers	58	QOL-AD Fun		Residential		2.31	0.75	1.97	0.94
Moyle 2011	proxy-proxy	Formal carers	58	QOL-AD Fun		Residential		2.31	0.75	2.16	0.95
Moyle 2011	proxy-proxy	Family carers	58	QOL-AD Friends		Residential		2.74	0.66	2.56	0.85
Moyle 2011	proxy-proxy	Formal carers	58	QOL-AD Friends		Residential		2.74	0.66	2.19	0.83
Moyle 2011	proxy-proxy	Family carers	58	QOL-AD Family		Residential		3.19	0.76	2.97	0.77
Moyle 2011	proxy-proxy	Formal carers	58	QOL-AD Family		Residential		3.19	0.76	3	0.88
Moyle 2011	proxy-proxy	Family carers	58	QOL-AD Energy		Residential		2.19	0.91	1.78	0.78
Moyle 2011	proxy-proxy	Formal carers	58	QOL-AD Energy		Residential		2.19	0.91	2	0.86
Moyle 2011	proxy-proxy	Family carers	58	QOL-AD Choices		Residential		2.67	0.76	2.19	0.83
Moyle 2011	proxy-proxy	Formal carers	58	QOL-AD Choices		Residential		2.67	0.76	2.14	0.87
Moyle 2011	proxy-proxy	Family carers	58	QOL-AD Busy		Residential		2.26	0.87	2	0.9
Moyle 2011	proxy-proxy	Formal carers	58	QOL-AD Busy		Residential		2.26	0.87	2.1	0.91
Nagalie 2006	not defined	Family carers	49	EQ-VAS		Mixed		81	14.5215	59	15.6515
Nagalie 2006	not defined	Family carers	28	QWB		Mixed		0.6	0.208516	0.42	0.237684
Nagalie 2006	not defined	Family carers	20	HUI3		Mixed		0.73	0.208516	0.23	0.237684
Nagalie 2006	not defined	Family carers	50	EQ-5D-3L		Mixed		0.86	0.210008	0.62	0.238424
Niikawa 2019	proxy-patient	Family carers	87	DEMQOL	Total	Mixed		90.61	13.9	96.64	15.68
Niikawa 2019	proxy-patient	Family carers	61	DEMQOL	Mild	Mixed	Mild	89.33	14.46	96.75	16.33
Niikawa 2019	proxy-patient	Family carers	26	DEMQOL	Moderate	Mixed	Moderate	93.62	12.21	96.23	14.28
Niikawa 2019	proxy-proxy	Family carers	87	QOL-AD	Total	Mixed		30.18	7.07	28.78	6.5
Niikawa 2019	proxy-proxy	Family carers	61	QOL-AD	Mild	Mixed	Mild	30.08	7.48	28.8	6.61
Niikawa 2019	proxy-proxy	Family carers	26	QOL-AD	Moderate	Mixed	Moderate	30.42	6.14	28.73	6.35
Niikawa 2019	not defined	Family carers	87	EQ-5D-3L	Total	Mixed		0.75	0.188	0.72	0.181
Niikawa 2019	not defined	Family carers	61	EQ-5D-3L	Mild	Mixed	Mild	0.733	0.197	0.724	0.163
Niikawa 2019	not defined	Family carers	26	EQ-5D-3L	Moderate	Mixed	Moderate	0.789	0.159	0.708	0.221
Nogueira 2021	proxy-proxy	Family carers	49	QOL-AD	Spouse	Community		34.4	4.7	29.4	5.9
Nogueira 2021	proxy-proxy	Family carers	49	QOL-AD	Non-spouse	Community		33.6	4.8	31.1	5.3
Nogueira 2021	proxy-proxy	Family carers	49	QOL-AD Whole	Spouse	Community		2.69	0.66	2.22	0.83
Nogueira 2021	proxy-proxy	Family carers	49	QOL-AD Whole	Non-spouse	Community		2.96	0.65	2.67	0.62
Nogueira 2021	proxy-proxy	Family carers	49	QOL-AD Self	Spouse	Community		2.53	0.65	2.32	0.82
Nogueira 2021	proxy-proxy	Family carers	49	QOL-AD Self	Non-spouse	Community		2.85	0.65	2.65	0.72
Nogueira 2021	proxy-proxy	Family carers	49	QOL-AD Physical	Spouse	Community		2.42	0.74	2.28	0.85
Nogueira 2021	proxy-proxy	Family carers	49	QOL-AD Physical	Non-spouse	Community		2.42	0.73	2.47	0.74
Nogueira 2021	proxy-proxy	Family carers	49	QOL-AD Mood	Spouse	Community		2.65	0.7	2.35	0.78
Nogueira 2021	proxy-proxy	Family carers	49	QOL-AD Mood	Non-spouse	Community		2.75	0.69	2.49	0.8
Nogueira 2021	proxy-proxy	Family carers	49	QOL-AD Money	Spouse	Community		2.14	0.79	2.12	0.75
Nogueira 2021	proxy-proxy	Family carers	49	QOL-AD Money	Non-spouse	Community		2.36	0.79	2.47	0.71
Nogueira 2021	proxy-proxy	Family carers	49	QOL-AD Memory	Spouse	Community		2.14	0.67	1.45	0.61
Nogueira 2021	proxy-proxy	Family carers	49	QOL-AD Memory	Non-spouse	Community		2.16	0.87	1.69	0.75
Nogueira 2021	proxy-proxy	Family carers	49	QOL-AD Marriage	Spouse	Community		3.26	0.57	3.14	0.64
Nogueira 2021	proxy-proxy	Family carers	49	QOL-AD Marriage	Non-spouse	Community		1.04	0.57	1.02	1.52
Nogueira 2021	proxy-proxy	Family carers	49	QOL-AD Living	Spouse	Community		3.14	0.5	2.95	0.75
Nogueira 2021	proxy-proxy	Family carers	49	QOL-AD Living	Non-spouse	Community		3.04	0.5	2.91	0.67
Nogueira 2021	proxy-proxy	Family carers	49	QOL-AD Fun	Spouse	Community		2.34	0.86	1.92	0.9
Nogueira 2021	proxy-proxy	Family carers	49	QOL-AD Fun	Non-spouse	Community		2.59	0.85	2.2	0.92
Nogueira 2021	proxy-proxy	Family carers	49	QOL-AD Friends	Spouse	Community		2.83	0.69	2.02	0.98
Nogueira 2021	proxy-proxy	Family carers	49	QOL-AD Friends	Non-spouse	Community		2.77	0.69	2.61	0.76
Nogueira 2021	proxy-proxy	Family carers	49	QOL-AD Family	Spouse	Community		3.22	0.47	2.73	0.94
Nogueira 2021	proxy-proxy	Family carers	49	QOL-AD Family	Non-spouse	Community		3.14	0.47	3.08	0.7
Nogueira 2021	proxy-proxy	Family carers	49	QOL-AD Energy	Spouse	Community		2.51	0.74	2.08	0.89
Nogueira 2021	proxy-proxy	Family carers	49	QOL-AD Energy	Non-spouse	Community		2.69	0.74	2.42	0.96
Nogueira 2021	proxy-proxy	Family carers	49	QOL-AD Chores	Spouse	Community		2.47	0.82	1.86	0.82
Nogueira 2021	proxy-proxy	Family carers	49	QOL-AD Chores	Non-spouse	Community		2.67	0.82	2.12	0.78
Novelli 2010	proxy-proxy	Family carers	30	QOL-AD	Mild	Mixed	Mild	36.8	5.2	33.3	5
Novelli 2010	proxy-proxy	Family carers	30	QOL-AD	Moderate	Mixed	Moderate	36.1	5.3	28.3	6
Olthof-Nefkens 2023	not defined	Undefined	57	DQI		Community		0.81	0.17	0.97	0.08
Orgeta 2015	proxy-proxy	Family carers	478	EQ-5D-3L	Total	Community		0.75	0.25	0.59	0.28	Kappa	0.34	0.28	0.43
Orgeta 2015	proxy-proxy	Family carers	344	EQ-5D-3L	Spousal carers	Community		0.75	0.26	0.61	0.29	Kappa	0.36	0.26	0.45
Orgeta 2015	proxy-proxy	Family carers	95	EQ-5D-3L	Adult carers	Community		0.74	0.22	0.51	0.26	Kappa	0.21	0.13	0.4
Orgeta 2015	proxy-proxy	Family carers	478	EQ-5D-3L	Mild - Total	Community	Mild	0.79	0.22	0.63	0.27
Orgeta 2015	proxy-proxy	Family carers	344	EQ-5D-3L	Mild - Spousal carers	Community	Mild	0.79	0.22	0.67	0.26
Orgeta 2015	proxy-proxy	Family carers	95	EQ-5D-3L	Mild - Adult carers	Community	Mild	0.79	0.17	0.53	0.26
Orgeta 2015	proxy-proxy	Family carers	478	EQ-5D-3L	Moderate - Total	Community	Moderate	0.72	0.23	0.52	0.27
Orgeta 2015	proxy-proxy	Family carers	344	EQ-5D-3L	Moderate - Spousal carers	Community	Moderate	0.73	0.22	0.52	0.29
Orgeta 2015	proxy-proxy	Family carers	95	EQ-5D-3L	Moderate - Adult carers	Community	Moderate	0.68	0.27	0.5	0.26
O'Shea 2020	proxy-proxy	Family carers	437	QOL-AD	T0 (Median IQR)	Community		34.75	6.54	32.25	6.53
O'Shea 2020	proxy-proxy	Family carers	437	QOL-AD	T1 Median IQR)	Community		34.25	6.69	31.75	6.89
O'Shea 2020	proxy-proxy	Family carers	437	QOL-AD	T2 (Median IQR)	Community		34.25	6.8	31.25	6.79
O'Shea 2020	not defined	Family carers	409	ICECAP-O	T0	Community		0.615	0.17	0.515	0.17
O'Shea 2020	not defined	Family carers	409	ICECAP-O	T1	Community		0.615	0.17	0.515	0.17
O'Shea 2020	not defined	Family carers	409	ICECAP-O	T2	Community		0.615	0.18	0.515	0.18
Phung 2018	proxy-proxy	Family carers	330	EQ-VAS		Community		76.3	17	63.4	19.5
Phung 2018	proxy-proxy	Family carers	330	QOL-AD		Community		39.2	5.8	33.9	6.4
Pizzo 2023	proxy-patient	Family carers	249	DEMQOL-U	COTiD_UK Baseline	Community		0.647	0.165	0.691	0.191
Pizzo 2023	proxy-patient	Family carers	211	DEMQOL-U	COTiD_UK 12 weeks	Community		0.634	0.165	0.662	0.191
Pizzo 2023	proxy-patient	Family carers	198	DEMQOL-U	COTiD_UK 26 weeks	Community		0.638	0.165	0.659	0.191
Pizzo 2023	proxy-patient	Family carers	219	DEMQOL-U	TAU Baseline	Community		0.634	0.165	0.683	0.191
Pizzo 2023	proxy-patient	Family carers	181	DEMQOL-U	TAU 12 weeks	Community		0.631	0.165	0.661	0.191
Pizzo 2023	proxy-patient	Family carers	155	DEMQOL-U	TAU 26 weeks	Community		0.603	0.165	0.645	0.191
Polat 2022	proxy-proxy	Undefined	29	QOL-AD	Before intervention	Community	Mild	35.81	6.33	33.72	5.06
Polat 2022	proxy-proxy	Undefined	29	QOL-AD	After intervention	Community	Mild	36.9	7.34	33.18	6.11
Ready 2004	not defined	Family carers	23	DQOL Self-esteem	Control	Community		3.95	0.5	4.4	0.55
Ready 2004	not defined	Family carers	30	DQOL Self-esteem	MCI	Community	Mild	3.65	0.625	3.825	0.775
Ready 2004	not defined	Family carers	26	DQOL Self-esteem	Mild	Community	Mild	3.425	0.7	2.825	0.8
Ready 2004	not defined	Family carers	23	DQOL Positive affect	Control	Community		3.95	0.583333	3.88333	0.7
Ready 2004	not defined	Family carers	30	DQOL Positive affect	MCI	Community	Mild	3.81667	0.566667	3.73333	0.733333
Ready 2004	not defined	Family carers	26	DQOL Positive affect	Mild	Community	Mild	3.85	0.55	3.21667	0.65
Ready 2004	not defined	Family carers	23	DQOL Negative affect	Control	Community		2.4	0.527273	2.37273	0.754545
Ready 2004	not defined	Family carers	30	DQOL Negative affect	MCI	Community	Mild	2.45455	0.636364	2.52727	0.618182
Ready 2004	not defined	Family carers	26	DQOL Negative affect	Mild	Community	Mild	2.54545	0.672727	2.91818	0.818182
Ready 2004	not defined	Family carers	23	DQOL Global QOL	Control	Community		4	0.8	3.9	1.1
Ready 2004	not defined	Family carers	30	DQOL Global QOL	MCI	Community	Mild	3.6	0.8	3.7	0.8
Ready 2004	not defined	Family carers	26	DQOL Global QOL	Mild	Community	Mild	3.4	0.9	2.9	0.9
Ready 2004	not defined	Family carers	23	DQOL Belonging	Control	Community		4.03333	0.6	4.26667	0.7
Ready 2004	not defined	Family carers	30	DQOL Belonging	MCI	Community	Mild	3.6	0.666667	3.76667	0.733333
Ready 2004	not defined	Family carers	26	DQOL Belonging	Mild	Community	Mild	3.86667	0.833333	3.43333	0.733333
Ready 2004	not defined	Family carers	23	DQOL Aesthetics	Control	Community		4.14	0.72	3.42	1
Ready 2004	not defined	Family carers	30	DQOL Aesthetics	MCI	Community	Mild	3.88	0.66	3.26	1.02
Ready 2004	not defined	Family carers	26	DQOL Aesthetics	Mild	Community	Mild	3.7	0.78	3.16	0.96
Rokstad 2017	proxy-proxy	Family carers	183	QOL-AD	Day care	Community		38.9	4.9	33.3	5.3
Rokstad 2017	proxy-proxy	Family carers	78	QOL-AD	Comparison	Community		36.1	5	33.5	4.9
Rombach 2020	proxy-proxy	Family carers	1020	QOL-AD		Community		35	6	30	6
Rombach 2020	not defined	Family carers	1020	EQ-5D-5L		Community		0.77	0.21	0.6	0.24
Römhild 2018	proxy-proxy	Mixed	1330	QOL-AD	Total	Mixed		32.2	6.1	29.8	5.5
Römhild 2018	proxy-proxy	Formal carers	476	QOL-AD	Nursing home	Mixed		32.5	6.3	31.5	5.8
Römhild 2018	proxy-proxy	Family carers	854	QOL-AD	Home care	Mixed		33.5	5.9	28.8	5.1
Römhild 2018	proxy-proxy	Mixed	1330	QOL-AD Whole	Total	Mixed		2.6	0.7	2.4	0.7	Kappa	0.02	-0.04	0.08
Römhild 2018	proxy-proxy	Formal carers	476	QOL-AD Whole	Nursing home	Mixed		2.6	0.8	2.5	0.7
Römhild 2018	proxy-proxy	Family carers	854	QOL-AD Whole	Home care	Mixed		2.7	0.7	2.3	0.7
Römhild 2018	proxy-proxy	Mixed	1330	QOL-AD Self	Total	Mixed		2.6	0.8	2.4	0.8	Kappa	0.09	0.03	0.14
Römhild 2018	proxy-proxy	Formal carers	476	QOL-AD Self	Nursing home	Mixed		2.5	0.8	2.6	0.7
Römhild 2018	proxy-proxy	Family carers	854	QOL-AD Self	Home care	Mixed		2.6	0.7	2.3	0.8
Römhild 2018	proxy-proxy	Mixed	1330	QOL-AD Physical	Total	Mixed		2.4	0.8	2.2	0.8	Kappa	0.26	0.2	0.31
Römhild 2018	proxy-proxy	Formal carers	476	QOL-AD Physical	Nursing home	Mixed		2.4	0.8	2.3	0.7
Römhild 2018	proxy-proxy	Family carers	854	QOL-AD Physical	Home care	Mixed		2.4	0.8	2.1	0.8
Römhild 2018	proxy-proxy	Mixed	1330	QOL-AD Mood	Total	Mixed		2.5	0.8	2.3	0.7	Kappa	0.15	0.1	0.21
Römhild 2018	proxy-proxy	Formal carers	476	QOL-AD Mood	Nursing home	Mixed		2.4	0.8	2.4	0.8
Römhild 2018	proxy-proxy	Family carers	854	QOL-AD Mood	Home care	Mixed		2.4	0.8	2.2	0.7
Römhild 2018	proxy-proxy	Mixed	1330	QOL-AD Money	Total	Mixed		2.5	0.7	2.5	0.8	Kappa	0.04	-0.02	0.1
Römhild 2018	proxy-proxy	Formal carers	476	QOL-AD Money	Nursing home	Mixed		2.4	0.8	2.4	0.8
Römhild 2018	proxy-proxy	Family carers	854	QOL-AD Money	Home care	Mixed		2.6	0.7	2.6	0.8
Römhild 2018	proxy-proxy	Mixed	1330	QOL-AD Memory	Total	Mixed		2.1	0.8	1.5	0.6	Kappa	0.11	0.05	0.17
Römhild 2018	proxy-proxy	Formal carers	476	QOL-AD Memory	Nursing home	Mixed		2.1	0.8	1.7	0.7
Römhild 2018	proxy-proxy	Family carers	854	QOL-AD Memory	Home care	Mixed		2	0.7	1.3	0.5
Römhild 2018	proxy-proxy	Mixed	1330	QOL-AD Marriage	Total	Mixed		3.1	0.8	2.9	0.8	Kappa	0.11	0.05	0.17
Römhild 2018	proxy-proxy	Formal carers	476	QOL-AD Marriage	Nursing home	Mixed		3	0.8	3	0.9
Römhild 2018	proxy-proxy	Family carers	854	QOL-AD Marriage	Home care	Mixed		3.1	0.7	2.9	0.8
Römhild 2018	proxy-proxy	Mixed	1330	QOL-AD Living	Total	Mixed		2.9	0.7	2.9	0.7	Kappa	0.15	0.11	0.2
Römhild 2018	proxy-proxy	Formal carers	476	QOL-AD Living	Nursing home	Mixed		2.7	0.7	2.9	0.7
Römhild 2018	proxy-proxy	Family carers	854	QOL-AD Living	Home care	Mixed		3	0.7	3	0.7
Römhild 2018	proxy-proxy	Mixed	1330	QOL-AD Fun	Total	Mixed		2.4	0.8	1.9	0.8	Kappa	0.04	-0.01	0.1
Römhild 2018	proxy-proxy	Formal carers	476	QOL-AD Fun	Nursing home	Mixed		2.3	0.9	2.2	0.9
Römhild 2018	proxy-proxy	Family carers	854	QOL-AD Fun	Home care	Mixed		2.4	0.8	1.7	0.8
Römhild 2018	proxy-proxy	Mixed	1330	QOL-AD Friends	Total	Mixed		2.6	0.8	2.3	0.9	Kappa	0.1	0.04	0.16
Römhild 2018	proxy-proxy	Formal carers	476	QOL-AD Friends	Nursing home	Mixed		2.6	0.8	2.4	0.9
Römhild 2018	proxy-proxy	Family carers	854	QOL-AD Friends	Home care	Mixed		2.6	0.8	2.2	0.9
Römhild 2018	proxy-proxy	Mixed	1330	QOL-AD Family	Total	Mixed		3	0.7	2.9	0.8	Kappa	0.11	0.06	0.17
Römhild 2018	proxy-proxy	Formal carers	476	QOL-AD Family	Nursing home	Mixed		2.9	0.8	3.1	0.8
Römhild 2018	proxy-proxy	Family carers	854	QOL-AD Family	Home care	Mixed		3.1	0.6	2.8	0.8
Römhild 2018	proxy-proxy	Mixed	1330	QOL-AD Energy	Total	Mixed		2.4	0.8	2.1	0.8	Kappa	0.17	0.11	0.23
Römhild 2018	proxy-proxy	Formal carers	476	QOL-AD Energy	Nursing home	Mixed		2.4	0.8	2.4	0.8
Römhild 2018	proxy-proxy	Family carers	854	QOL-AD Energy	Home care	Mixed		2.4	0.8	1.9	0.8
Römhild 2018	proxy-proxy	Mixed	1330	QOL-AD Chores	Total	Mixed		2.2	0.9	1.6	30.8	Kappa	0.06	0.01	0.1
Römhild 2018	proxy-proxy	Formal carers	476	QOL-AD Chores	Nursing home	Mixed		2.2	0.9	1.7	0.8
Römhild 2018	proxy-proxy	Family carers	854	QOL-AD Chores	Home care	Mixed		2.2	0.8	1.5	0.7
Ruggero 2023	proxy-proxy	Family carers	18	QoL-AD		Community		38.8	7	36.7	5.4
Samus 2014	proxy-proxy	Family carers	193	QOL-AD	Augmented Usual B	Community		36.8	0.5	31.3	0.5
Samus 2014	proxy-proxy	Family carers	193	QOL-AD	Augmented Usual 9m	Community		36.7	0.6	33.1	0.5
Samus 2014	proxy-proxy	Family carers	193	QOL-AD	Augmented Usual 18m	Community		35.9	0.6	31.7	0.6
Samus 2014	proxy-proxy	Family carers	110	QOL-AD	Intervention B	Community		37.2	0.7	32.2	0.6
Samus 2014	proxy-proxy	Family carers	110	QOL-AD	Intervention 9m	Community		37.7	0.8	32.2	0.6
Samus 2014	proxy-proxy	Family carers	110	QOL-AD	Intervention 18m	Community		38.2	0.8	32.2	0.7
Sands 2004	proxy-proxy	Family carers	86	DQOL Self-esteem		Community		3.31	0.496801	2.9	0.662401	ICC	0.06
Sands 2004	proxy-proxy	Family carers	86	DQOL Positive affect		Community		3.56	0.75703	3.2	0.686059	ICC	0.33
Sands 2004	proxy-proxy	Family carers	87	DQOL Negative affect		Community		3.84	0.785213	3.13	0.690036	ICC	0.3
Sands 2004	proxy-proxy	Family carers	82	DQOL Belonging		Community		3.66	0.762316	3.21	0.739215	ICC	0.11
Sands 2004	proxy-proxy	Family carers	86	DQOL Aesthetics		Community		3.98	0.733373	3.3	0.969945	ICC	0.15
Santos 2022	proxy-proxy	Family carers	102	QoL-AD		Community		33.8	5.1	29.8	5.9
Sari 2023	proxy-proxy	Family carers	30	QoL-AD	Baseline	Community		28.8	5.2	29.1	5.3
Sari 2023	proxy-proxy	Family carers	30	QoL-AD	12 weeks	Community		32	5.3	33.8	4.8
Sari 2023	proxy-proxy	Family carers	30	QoL-AD	18 weeks	Community		32	5.1	33.6	4.4
Schuman 2019	proxy-proxy	Family carers	70	QOL-AD		Mixed		36.45	5.358	28.54	6.2
Sheehan 2012	proxy-proxy	Family carers	109	QOL-AD		Residential		32.2	7.99003	24.7	5.85936
Sheehan 2012	not defined	Family carers	109	EQ-5D-3L		Residential		0.71	0.346235	0.3	0.426135
Shikimoto 2020	proxy-proxy	Family carers	42	QOL-AD	Mild	Community	Mild	25.81	4.96	25.05	6.99
Shikimoto 2020	proxy-proxy	Family carers	35	QOL-AD	Moderate	Community	Moderate	24.74	5.25	20.49	4.15
Shikimoto 2020	proxy-proxy	Family carers	42	QOL-AD Whole	Mild	Community	Mild	1.9	0.57	2	0.66
Shikimoto 2020	proxy-proxy	Family carers	35	QOL-AD Whole	Moderate	Community	Moderate	1.91	0.44	1.57	0.5
Shikimoto 2020	proxy-proxy	Family carers	42	QOL-AD Self	Mild	Community	Mild	1.98	0.51	1.98	0.68
Shikimoto 2020	proxy-proxy	Family carers	35	QOL-AD Self	Moderate	Community	Moderate	1.8	0.63	1.51	0.5
Shikimoto 2020	proxy-proxy	Family carers	42	QOL-AD Physical	Mild	Community	Mild	2.43	0.54	2.45	0.73
Shikimoto 2020	proxy-proxy	Family carers	35	QOL-AD Physical	Moderate	Community	Moderate	1.97	0.61	2.23	0.73
Shikimoto 2020	proxy-proxy	Family carers	42	QOL-AD Mood	Mild	Community	Mild	1.98	0.68	1.71	0.83
Shikimoto 2020	proxy-proxy	Family carers	35	QOL-AD Mood	Moderate	Community	Moderate	1.94	0.59	1.26	0.5
Shikimoto 2020	proxy-proxy	Family carers	42	QOL-AD Money	Mild	Community	Mild	2.07	0.51	2.14	0.56
Shikimoto 2020	proxy-proxy	Family carers	35	QOL-AD Money	Moderate	Community	Moderate	1.97	0.7	1.94	0.33
Shikimoto 2020	proxy-proxy	Family carers	42	QOL-AD Memory	Mild	Community	Mild	1.57	0.59	1.38	0.69
Shikimoto 2020	proxy-proxy	Family carers	35	QOL-AD Memory	Moderate	Community	Moderate	1.74	0.65	1.26	0.44
Shikimoto 2020	proxy-proxy	Family carers	42	QOL-AD Marriage	Mild	Community	Mild	2.1	0.61	2	0.76
Shikimoto 2020	proxy-proxy	Family carers	35	QOL-AD Marriage	Moderate	Community	Moderate	2.14	0.55	1.69	0.71
Shikimoto 2020	proxy-proxy	Family carers	42	QOL-AD Living	Mild	Community	Mild	2.07	0.55	2.17	0.66
Shikimoto 2020	proxy-proxy	Family carers	35	QOL-AD Living	Moderate	Community	Moderate	1.77	0.59	1.66	0.63
Shikimoto 2020	proxy-proxy	Family carers	42	QOL-AD Fun	Mild	Community	Mild	1.83	0.62	1.9	0.82
Shikimoto 2020	proxy-proxy	Family carers	35	QOL-AD Fun	Moderate	Community	Moderate	1.8	0.67	1.4	0.55
Shikimoto 2020	proxy-proxy	Family carers	42	QOL-AD Friends	Mild	Community	Mild	1.93	0.67	1.83	0.79
Shikimoto 2020	proxy-proxy	Family carers	35	QOL-AD Friends	Moderate	Community	Moderate	1.8	0.72	1.46	0.56
Shikimoto 2020	proxy-proxy	Family carers	42	QOL-AD Family	Mild	Community	Mild	2.07	0.64	1.98	0.81
Shikimoto 2020	proxy-proxy	Family carers	35	QOL-AD Family	Moderate	Community	Moderate	2.03	0.51	1.74	0.7
Shikimoto 2020	proxy-proxy	Family carers	42	QOL-AD Energy	Mild	Community	Mild	1.9	0.61	1.64	0.82
Shikimoto 2020	proxy-proxy	Family carers	35	QOL-AD Energy	Moderate	Community	Moderate	1.91	0.5	1.29	0.51
Shikimoto 2020	proxy-proxy	Family carers	42	QOL-AD Chores	Mild	Community	Mild	1.98	0.64	1.86	0.71
Shikimoto 2020	proxy-proxy	Family carers	35	QOL-AD Chores	Moderate	Community	Moderate	1.94	0.59	1.49	0.56
Snow 2005	proxy-proxy	Family carers	89	QOL-AD		Community		31.33	9.86	29.76	6.98
Sousa 2013	proxy-proxy	Family carers	41	QOL-AD		Community		32.3	4.6	29.2	6.3
Sousa 2013	proxy-proxy	Family carers	41	QOL-AD Whole		Community		2.7	0.5	2.4	0.6
Sousa 2013	proxy-proxy	Family carers	41	QOL-AD Self		Community		2.7	0.6	2.6	1.2
Sousa 2013	proxy-proxy	Family carers	41	QOL-AD Physical		Community		2.7	0.7	2.6	0.8
Sousa 2013	proxy-proxy	Family carers	41	QOL-AD Mood		Community		2.4	0.7	2.4	0.7
Sousa 2013	proxy-proxy	Family carers	41	QOL-AD Money		Community		2.1	0.7	2.3	0.8
Sousa 2013	proxy-proxy	Family carers	41	QOL-AD Memory		Community		2	0.7	1.4	0.5
Sousa 2013	proxy-proxy	Family carers	41	QOL-AD Marriage		Community		6.8	2.8	6.5	3.1
Sousa 2013	proxy-proxy	Family carers	41	QOL-AD Living		Community		3.3	0.5	3	0.6
Sousa 2013	proxy-proxy	Family carers	41	QOL-AD Fun		Community		2.7	1.3	2.1	0.8
Sousa 2013	proxy-proxy	Family carers	41	QOL-AD Friends		Community		3.1	1.5	2.9	1.9
Sousa 2013	proxy-proxy	Family carers	41	QOL-AD Family		Community		2.8	0.6	2.7	0.8
Sousa 2013	proxy-proxy	Family carers	41	QOL-AD Energy		Community		2.6	0.8	2.1	0.8
Sousa 2013	proxy-proxy	Family carers	41	QOL-AD Chores		Community		2.7	0.5	2	0.7
Sousa 2018	proxy-proxy	Family carers	75	QOL-AD	Baseline	Community		33.1	4.51	29.89	5.76
Sousa 2018	proxy-proxy	Family carers	75	QOL-AD	Follow-up	Community		33.17	5.39	28.89	5.84
Sousa 2018	proxy-proxy	Family carers	75	QOL-AD Whole	Baseline	Community		2.74	0.69	2.53	0.7
Sousa 2018	proxy-proxy	Family carers	75	QOL-AD Whole	Follow-up	Community		2.65	0.7	2.36	0.74
Sousa 2018	proxy-proxy	Family carers	75	QOL-AD Self	Baseline	Community		2.66	0.72	2.53	0.74
Sousa 2018	proxy-proxy	Family carers	75	QOL-AD Self	Follow-up	Community		2.7	0.76	2.33	0.64
Sousa 2018	proxy-proxy	Family carers	75	QOL-AD Physical	Baseline	Community		2.57	0.66	2.58	0.75
Sousa 2018	proxy-proxy	Family carers	75	QOL-AD Physical	Follow-up	Community		2.54	0.87	2.49	0.68
Sousa 2018	proxy-proxy	Family carers	75	QOL-AD Mood	Baseline	Community		2.6	0.75	2.36	0.78
Sousa 2018	proxy-proxy	Family carers	75	QOL-AD Mood	Follow-up	Community		2.62	0.83	2.4	0.78
Sousa 2018	proxy-proxy	Family carers	75	QOL-AD Money	Baseline	Community		2.16	0.77	2.22	0.78
Sousa 2018	proxy-proxy	Family carers	75	QOL-AD Money	Follow-up	Community		2.17	0.81	2.06	0.89
Sousa 2018	proxy-proxy	Family carers	75	QOL-AD Memory	Baseline	Community		2.09	0.64	1.58	0.63
Sousa 2018	proxy-proxy	Family carers	75	QOL-AD Memory	Follow-up	Community		2.09	0.71	1.41	0.54
Sousa 2018	proxy-proxy	Family carers	75	QOL-AD Marriage	Baseline	Community		1.48	1.63	1.42	1.56
Sousa 2018	proxy-proxy	Family carers	75	QOL-AD Marriage	Follow-up	Community		1.57	1.62	1.46	1.55
Sousa 2018	proxy-proxy	Family carers	75	QOL-AD Living	Baseline	Community		3.18	0.56	3.05	0.73
Sousa 2018	proxy-proxy	Family carers	75	QOL-AD Living	Follow-up	Community		3.24	0.69	3.04	0.9
Sousa 2018	proxy-proxy	Family carers	75	QOL-AD Fun	Baseline	Community		2.44	0.91	2.08	0.92
Sousa 2018	proxy-proxy	Family carers	75	QOL-AD Fun	Follow-up	Community		2.37	0.85	2	0.83
Sousa 2018	proxy-proxy	Family carers	75	QOL-AD Friends	Baseline	Community		2.85	0.71	2.44	0.9
Sousa 2018	proxy-proxy	Family carers	75	QOL-AD Friends	Follow-up	Community		2.84	0.78	2.45	0.96
Sousa 2018	proxy-proxy	Family carers	75	QOL-AD Family	Baseline	Community		2.98	0.62	2.84	0.71
Sousa 2018	proxy-proxy	Family carers	75	QOL-AD Family	Follow-up	Community		3.17	0.68	2.82	0.82
Sousa 2018	proxy-proxy	Family carers	75	QOL-AD Energy	Baseline	Community		2.57	0.79	2.14	0.86
Sousa 2018	proxy-proxy	Family carers	75	QOL-AD Energy	Follow-up	Community		2.58	0.8	2.13	0.81
Sousa 2018	proxy-proxy	Family carers	75	QOL-AD Chores	Baseline	Community		2.73	0.62	2.08	0.78
Sousa 2018	proxy-proxy	Family carers	75	QOL-AD Chores	Follow-up	Community		2.61	0.73	1.93	0.77
Söylemez 2020	proxy-proxy	Family carers	98	QOL-AD		Community		38.3	4.26	31.58	4.85
Tay 2014	proxy-proxy	Family carers	165	QOL-AD		Community		34.4	6.5	30.4	5.3	ICC	0.31
Torrison 2016	proxy-proxy	Family carers	139	QOL-AD		Community		33.3	5.2	30.6	7.1	ICC	0.05
Torrison 2016	proxy-proxy	Family carers	139	QOL-AD Whole		Community		2.8	0.8	2.4	0.9
Torrison 2016	proxy-proxy	Family carers	139	QOL-AD Self		Community		2.4	0.8	2.3	0.7	ICC	0.28
Torrison 2016	proxy-proxy	Family carers	139	QOL-AD Physical		Community		2	0.8	1.7	0.7	ICC	0.23
Torrison 2016	proxy-proxy	Family carers	139	QOL-AD Mood		Community		2.5	0.8	2.2	0.8	ICC	0.25
Torrison 2016	proxy-proxy	Family carers	139	QOL-AD Money		Community		2.8	0.8	2.9	0.8	ICC	0.15
Torrison 2016	proxy-proxy	Family carers	139	QOL-AD Memory		Community		2.4	0.8	2.4	1	ICC	0.34
Torrison 2016	proxy-proxy	Family carers	139	QOL-AD Marriage		Community		2.8	0.9	2.6	1	ICC	0.29
Torrison 2016	proxy-proxy	Family carers	139	QOL-AD Living		Community		3.3	0.7	3	0.9	ICC	0.35
Torrison 2016	proxy-proxy	Family carers	139	QOL-AD Fun		Community		2.3	0.9	2	1	ICC	0.38
Torrison 2016	proxy-proxy	Family carers	139	QOL-AD Friends		Community		2.7	0.9	2.4	1	ICC	0.13
Torrison 2016	proxy-proxy	Family carers	139	QOL-AD Family		Community		3.4	0.7	3.1	0.9	ICC	0.52
Torrison 2016	proxy-proxy	Family carers	139	QOL-AD Energy		Community		1.9	0.8	1.8	0.8	ICC	0.25
Torrison 2016	proxy-proxy	Family carers	139	QOL-AD Chores		Community		2.1	0.8	1.9	0.8	ICC	0.27
Trigg 2015	proxy-patient	Family carers	70	DEMQOL	Baseline	Mixed		95.2	13.73	97.61	14.06
Trigg 2015	proxy-patient	Family carers	69	DEMQOL	18m	Mixed		96.43	12.35	100.38	12.56
Trigg 2015	not defined	Family carers	70	EQ-5D-3L	Baseline	Mixed		0.81	0.22	0.76	0.23
Trigg 2015	not defined	Family carers	69	EQ-5D-3L	18m	Mixed		0.83	0.18	0.74	0.23
van Santen 2020	not defined	Family carers	65	EQ-5D-5L	Exergaming group T0	Community		0.7	0.3	0.4	0.3
van Santen 2020	not defined	Family carers	53	EQ-5D-5L	Exergaming group T1	Community		0.7	0.3	0.5	0.3
van Santen 2020	not defined	Family carers	42	EQ-5D-5L	Exergaming group T2	Community		0.8	0.2	0.5	0.3
van Santen 2020	not defined	Family carers	35	EQ-5D-5L	Control T0	Community		0.8	0.3	0.5	0.3
van Santen 2020	not defined	Family carers	32	EQ-5D-5L	Control T1	Community		0.8	0.2	0.5	0.2
van Santen 2020	not defined	Family carers	23	EQ-5D-5L	Control T2	Community		0.9	0.2	0.5	0.3
Wolak 2009	proxy-proxy	Family carers	120	QOL-AD		Mixed		35.8	5.1	32.54	4.9	ICC	0.43
Wolak 2009	proxy-proxy	Family carers	120	QOL-AD Whole		Mixed		2.9	0.7	2.5	0.7	ICC	0.31
Wolak 2009	proxy-proxy	Family carers	120	QOL-AD Self		Mixed		2.3	0.7	2.5	0.8	ICC	0.3
Wolak 2009	proxy-proxy	Family carers	120	QOL-AD Physical		Mixed		2.7	0.6	2.4	0.7	ICC	0.43
Wolak 2009	proxy-proxy	Family carers	120	QOL-AD Mood		Mixed		2.5	0.7	2.4	0.7	ICC	0.35
Wolak 2009	proxy-proxy	Family carers	120	QOL-AD Money		Mixed		2.9	0.7	2.4	0.9	ICC	0.35
Wolak 2009	proxy-proxy	Family carers	120	QOL-AD Memory		Mixed		2	0.6	1.8	0.6	ICC	0.22
Wolak 2009	proxy-proxy	Family carers	120	QOL-AD Marriage		Mixed		3.2	0.7	2.9	0.7	ICC	0.19
Wolak 2009	proxy-proxy	Family carers	120	QOL-AD Living		Mixed		3.1	0.7	3.1	0.6	ICC	0.31
Wolak 2009	proxy-proxy	Family carers	120	QOL-AD Fun		Mixed		2.7	0.8	2.1	0.8	ICC	0.2
Wolak 2009	proxy-proxy	Family carers	120	QOL-AD Friends		Mixed		3	0.6	2.9	0.6	ICC	0.01
Wolak 2009	proxy-proxy	Family carers	120	QOL-AD Family		Mixed		3.2	0.7	3	0.8	ICC	0.28
Wolak 2009	proxy-proxy	Family carers	120	QOL-AD Energy		Mixed		2.6	0.7	2.3	0.7	ICC	0.27
Wolak 2009	proxy-proxy	Family carers	120	QOL-AD Chores		Mixed		2.6	0.7	2.1	0.8	ICC	0.11
Wu 2020	proxy-proxy	Family carers	715	QOL-AD	Alzheimers Disease	Community		37.7	5.5	34.1	5.7
Wu 2020	proxy-proxy	Family carers	143	QOL-AD	Vascular	Community		35.9	6.5	32.5	6.3
Wu 2020	proxy-proxy	Family carers	263	QOL-AD	Mixed	Community		36.3	5.9	33.8	6
Wu 2020	proxy-proxy	Family carers	45	QOL-AD	FTD	Community		38.7	5.4	33.1	5.9
Wu 2020	proxy-proxy	Family carers	43	QOL-AD	PDD	Community		33.1	5.7	32.1	4.8
Wu 2020	proxy-proxy	Family carers	43	QOL-AD	DLB	Community		33	6.3	31.4	5.7
Wu 2020	proxy-proxy	Family carers	32	QOL-AD	Other	Community		34.7	8.1	31.3	6.8
Yamada 2020	proxy-proxy	Family carers	132	QOL-AD		Community		27.5	4.9	25.8	4.9
Yeaman 2012	proxy-proxy	Family carers	10	QOL-AD		Community		39.6	1.37	33	4.99
Yeaman 2012	proxy-proxy	Family carers	10	QOL-AD Whole		Community		3.3	0.48	3.1	0.74
Yeaman 2012	proxy-proxy	Family carers	10	QOL-AD Self		Community		3.2	0.42	1.8	0.82
Yeaman 2012	proxy-proxy	Family carers	10	QOL-AD Physical		Community		2.9	0.74	2.2	0.92
Yeaman 2012	proxy-proxy	Family carers	10	QOL-AD Mood		Community		2.9	0.32	2.4	0.84
Yeaman 2012	proxy-proxy	Family carers	10	QOL-AD Money		Community		3	0.67	3.1	1.05
Yeaman 2012	proxy-proxy	Family carers	10	QOL-AD Memory		Community		2.9	0.74	3.5	0.52
Yeaman 2012	proxy-proxy	Family carers	10	QOL-AD Marriage		Community		3.5	0.53	3	1.2
Yeaman 2012	proxy-proxy	Family carers	10	QOL-AD Living		Community		3.2	0.63	1.4	0.67
Yeaman 2012	proxy-proxy	Family carers	10	QOL-AD Fun		Community		2.6	0.52	2	0.92
Yeaman 2012	proxy-proxy	Family carers	10	QOL-AD Friends		Community		3.1	0.57	3	0.82
Yeaman 2012	proxy-proxy	Family carers	10	QOL-AD Family		Community		3.4	0.7	2.9	0.53
Yeaman 2012	proxy-proxy	Family carers	10	QOL-AD Energy		Community		2.5	0.85	2.2	0.92
Yeaman 2012	proxy-proxy	Family carers	10	QOL-AD Chores		Community		3.1	0.74	2.2	1.03
Yu 2013	proxy-proxy	Family carers	87	QOL-AD		Community		28.78	4.3	30.05	6.05	ICC	0.25	0.16	0.35
Yu 2013	proxy-proxy	Family carers	87	QOL-AD Whole		Community		1.81	1.03	2.06	0.88
Yu 2013	proxy-proxy	Family carers	87	QOL-AD Self		Community		2.27	0.86	2.1	0.89
Yu 2013	proxy-proxy	Family carers	87	QOL-AD Physical		Community		2.07	0.66	2.1	0.73
Yu 2013	proxy-proxy	Family carers	87	QOL-AD Mood		Community		2.29	0.73	2.31	0.62
Yu 2013	proxy-proxy	Family carers	87	QOL-AD Money		Community		2.36	0.63	2.51	0.7
Yu 2013	proxy-proxy	Family carers	87	QOL-AD Memory		Community		2.54	0.81	2.49	0.98
Yu 2013	proxy-proxy	Family carers	87	QOL-AD Marriage		Community		2.69	0.67	2.8	0.64
Yu 2013	proxy-proxy	Family carers	87	QOL-AD Living		Community		1.71	0.73	2.34	0.76
Yu 2013	proxy-proxy	Family carers	87	QOL-AD Fun		Community		2.06	0.72	2.08	0.8
Yu 2013	proxy-proxy	Family carers	87	QOL-AD Friends		Community		2.28	0.69	2.39	0.79
Yu 2013	proxy-proxy	Family carers	87	QOL-AD Family		Community		2.67	0.7	2.85	0.67
Yu 2013	proxy-proxy	Family carers	87	QOL-AD Energy		Community		2.15	0.65	2.16	0.73
Yu 2013	proxy-proxy	Family carers	87	QOL-AD Chores		Community		1.88	0.74	1.84	0.75
Zhao 2011	proxy-proxy	Family carers	122	QOL-AD		Mixed		35.8	5.1	32.5	4.8	ICC	0.58
Zhao 2011	proxy-proxy	Family carers	122	QOL-AD Whole		Mixed		2.9	0.7	2.5	0.7	ICC	0.43
Zhao 2011	proxy-proxy	Family carers	122	QOL-AD Self		Mixed		2.3	0.7	2.5	0.8	ICC	0.45
Zhao 2011	proxy-proxy	Family carers	122	QOL-AD Physical		Mixed		2.7	0.6	2.5	0.7	ICC	0.59
Zhao 2011	proxy-proxy	Family carers	122	QOL-AD Mood		Mixed		2.5	0.7	2.4	0.7	ICC	0.51
Zhao 2011	proxy-proxy	Family carers	122	QOL-AD Money		Mixed		2.9	0.7	2.4	1	ICC	0.46
Zhao 2011	proxy-proxy	Family carers	122	QOL-AD Memory		Mixed		2	0.6	1.8	0.6	ICC	0.32
Zhao 2011	proxy-proxy	Family carers	122	QOL-AD Marriage		Mixed		3.2	0.7	3	0.7	ICC	0.32
Zhao 2011	proxy-proxy	Family carers	122	QOL-AD Living		Mixed		3	0.7	3	0.6	ICC	0.47
Zhao 2011	proxy-proxy	Family carers	122	QOL-AD Fun		Mixed		2.7	0.8	2.1	0.8	ICC	0.28
Zhao 2011	proxy-proxy	Family carers	122	QOL-AD Friends		Mixed		3	0.6	2.9	0.6	ICC	0.02
Zhao 2011	proxy-proxy	Family carers	122	QOL-AD Family		Mixed		3.2	0.7	3	0.7	ICC	0.42
Zhao 2011	proxy-proxy	Family carers	122	QOL-AD Energy		Mixed		2.6	0.7	2.3	0.7	ICC	0.41
Zhao 2011	proxy-proxy	Family carers	122	QOL-AD Chores		Mixed		2.7	0.7	2.1	0.8	ICC	0.14
Zucchella 2015	proxy-proxy	Family carers	135	QOL-AD		Community		32.1	7.3	26.9	7.2
Zucchella 2015	proxy-proxy	Family carers	135	QOL-AD Whole		Community		2.5	0.8	2.2	0.7
Zucchella 2015	proxy-proxy	Family carers	135	QOL-AD Self		Community		2.5	0.7	2.1	0.8
Zucchella 2015	proxy-proxy	Family carers	135	QOL-AD Physical		Community		2.6	0.8	2.3	0.8
Zucchella 2015	proxy-proxy	Family carers	135	QOL-AD Mood		Community		2.6	0.8	2	0.8
Zucchella 2015	proxy-proxy	Family carers	135	QOL-AD Money		Community		2.5	0.7	2.2	0.8
Zucchella 2015	proxy-proxy	Family carers	135	QOL-AD Memory		Community		1.9	0.7	1.6	0.8
Zucchella 2015	proxy-proxy	Family carers	135	QOL-AD Marriage		Community		2.5	1.3	2.3	1
Zucchella 2015	proxy-proxy	Family carers	135	QOL-AD Living		Community		3.2	0.8	2.7	0.8
Zucchella 2015	proxy-proxy	Family carers	135	QOL-AD Fun		Community		1.8	0.9	1.6	0.8
Zucchella 2015	proxy-proxy	Family carers	135	QOL-AD Friends		Community		2.4	1	2	0.9
Zucchella 2015	proxy-proxy	Family carers	135	QOL-AD Family		Community		3	0.9	2.6	0.8
Zucchella 2015	proxy-proxy	Family carers	135	QOL-AD Energy		Community		2.5	0.9	2	0.8
Zucchella 2015	proxy-proxy	Family carers	135	QOL-AD Chores		Community		2.3	0.9	1.9	1
